# Supplementary material for: Manipulating the oxygen reduction activity of platinum shells with shape-controlled palladium nanocrystal cores
Source: Royal Society of Chemistry journal article supplement (doi:10.1039/c3cc43276a), 2013-01-01
Supplement: c3cc43276a.pdf [file c3cc43276a.pdf]

Supporting Information for

# Manipulating the Oxygen Reduction Activity of Platinum Shells with Shape-Controlled Palladium Nanocrystal Cores

Minhua Shao,<sup>†,\*,#</sup> Guannan He,<sup>‡</sup> Amra Peles,<sup>||</sup> Jonathan H. Odell,<sup>†</sup> Jie Zeng,<sup>§</sup> Dong Su,<sup>⊥</sup> Jing Tao,<sup>⊥</sup> Taekyung Yu,<sup>§</sup> Yimei Zhu,<sup>⊥</sup> and Younan Xia<sup>§,¥,\*</sup>

<sup>†</sup>*UTC Power, South Windsor, CT 06074, United States*

<sup>‡</sup>*Department of Chemistry, Washington University, St. Louis, Missouri 63130, United States*

<sup>||</sup>*United Technologies Research Center, East Hartford, CT 06118, United States*

<sup>§</sup>*Department of Biomedical Engineering, Washington University, St. Louis, Missouri 63130, United States*

<sup>⊥</sup>*Condensed Matter Physics & Materials Science Department, Brookhaven National Laboratory, Upton, New York 11973, United States*

<sup>#</sup>*Current address: Ford Motor Company, Dearborn, MI, 48124, USA*

<sup>¥</sup>*Current address: Department of Biomedical Engineering and School of Chemistry & Biochemistry, Georgia Institute of Technology, Atlanta, GA 30332, United States*

<sup>\*</sup>To whom correspondence should be addressed.

E-mail: minhua.shao@utcpower.com (M.S.); younan.xia@bme.gatech.edu (Y.X.).



## Experiments

**Synthesis of Pd Nanocrystals.** In a typical synthesis of Pd nanocubes, 11 mL of an aqueous solution containing poly(vinyl pyrrolidone) (PVP, MW = 55,000, 105 mg, Aldrich), L-ascorbic acid (60 mg, Aldrich), KCl (185 mg, J. T. Baker), KBr (5 mg, Aldrich), and Na<sub>2</sub>PdCl<sub>4</sub> (57 mg, Aldrich) was heated at 80 °C in air under magnetic stirring for 3 h and cooled down to room temperature. In the synthesis of Pd octahedral, PVP (105 mg, Aldrich), citric acid, (180 mg, Aldrich), and Na<sub>2</sub>PdCl<sub>4</sub> (57 mg, Aldrich) were dissolved in a mixture solution containing 3 mL of ethanol and 8 mL of water. The resulting solution was heated at 80 °C in air under magnetic stirring for 3 h and cooled down to room temperature.

To load the Pd nanocrystals on the carbon powder, 80 mg of Ketjen Black was dispersed in 5 mL of deionized water and sonicated for 1 h. The carbon black suspension was then added to the 11 mL of dispersion of Pd nanocrystals and the reaction mixture was heated to 80 °C in air for 2 h. After cooling to room temperature, the precipitate was retrieved by centrifugation to give a black powder. The final product was dried in air and ready for test.

**Electrochemical Evaluation and Pt Monolayer Deposition.** Approximately 15 mg of the Pd/C nanocrystals was dispersed in a solvent consisting of 12 ml of water, 3 ml of isopropanol, and 60 µl of 5% Nafion (Aldrich) by ultrasonic for 10 min. 10 µl of the suspension was deposited on a pre-cleaned glassy carbon rotating disk electrode (RDE, Pine Instruments) and allowed to dry in air. The capping agents (poly(vinyl pyrrolidone), Br<sup>-</sup> and Cl<sup>-</sup>) on Pd surfaces can be removed using a non-destructive method at room temperature by keeping the electrode potential at the hydrogen evaluation region, for example -0.05 V for 60 s. After removing the capping agents, the catalyst was cycled between 0.08 and 0.8 V (vs. the reversible hydrogen electrode or RHE) for 5 cycles in a N<sub>2</sub> saturated aqueous solution of 0.1 M HClO<sub>4</sub> at 50 mV s<sup>-1</sup>. The up-limit potential was set to 0.8 V to minimize the dissolution of Pd at high potentials.

The Pt shell was prepared via galvanic displacement with an underpotentially deposited (UPD) Cu monolayer prepared from a 50 mM H<sub>2</sub>SO<sub>4</sub> + 50 mM CuSO<sub>4</sub> solution. The electrode, covered with a Cu monolayer was rinsed and immersed in a 1.0 mM K<sub>2</sub>PtCl<sub>4</sub> (Johnson Matthey) + 50 mM H<sub>2</sub>SO<sub>4</sub> (GFS Chemicals) solution for about 2 min to displace the Cu with Pt. An Ag/AgCl/KCl (3 M) leak-free electrode and Pt gauze were used as reference and counter electrodes, respectively. All potentials are quoted with respect to RHE. All of these operations were carried out under a nitrogen atmosphere. The electrochemical area and Pt loading were

measured based on the charge associated with the stripping of a UPD Cu monolayer on Pd, assuming 420, 490 and 460  $\mu\text{C cm}^{-2}$  for full Cu monolayer coverage on cubes, octahedra, and conventional particles, respectively.

The oxygen reduction polarization curves were measured in an oxygen saturated 0.1 M  $\text{HClO}_4$  (GFS Chemicals) solution at a scan rate of 10  $\text{mV s}^{-1}$  at 1600 rpm. The kinetic current  $j_k$  at 0.9 V was derived by the Koutecky-Levich equation

$$\frac{1}{j} = \frac{1}{j_k} + \frac{1}{B\omega^{1/2}}$$

where  $j$  is the measured current density,  $B$  is a constant, and  $\omega$  is the rotation rate. All the Electrolytes were prepared from MilliQ UV-plus water (Millipore).

**Physical Characterization.** Powder X-ray diffraction patterns (XRD) were taken by a commercial diffractometer (Bruker AXS D8 Discover) using Cu K $\alpha$  radiation ( $\lambda = 1.54056 \text{ \AA}$ ). The particle size was calculated using the Scherrer equation.

Transmission electron microscopy (TEM) studies were done with a FEI Tecnai G2 Spirit microscope operated at 120 kV by drop casting the dispersions of nanoparticles on carbon-coated copper grids. High-resolution TEM analyses were carried out using a JEOL 3000F microscope operated at 300 kV. High-angle annular dark-field (HAADF) STEM images were acquired using an aberration corrected Hitachi HD2700C STEM.

**DFT Calculations.** The first-principles calculations are based on spin-polarized density functional theory (DFT) using a Generalized Gradient Approximation (GGA)<sup>1</sup> and projector augmented wave (PAW) method<sup>2</sup> as implemented in Vienna Ab-Initio Simulation Package (VASP).<sup>3</sup> The cut-off energy for plane wave basis set was 400 eV and Brillouin zone was sampled using a Monkhorst-Pack sampling technique<sup>3</sup> with  $5 \times 5 \times 1$  k-point grid for surface calculations. The Pt monolayer surfaces are modeled as pseudomorphic layers placed on top of the Pd(111) and Pd(100) surfaces with a lattice constant corresponding to the bulk substrate. Surfaces are modeled by 6-layer slabs with  $2 \times 2$  surface cell separated by a 14  $\text{\AA}$  vacuum layer perpendicular to the surface. The top four layers were fully relaxed until Hellmann–Feynman forces were 0.01  $\text{eV \AA}^{-1}$ . The binding energy of atomic oxygen is calculated as  $\text{BE}_o = E(\text{O/surface}) - E(\text{surface}) - 1/2E(\text{O}_2)$ . The  $E(\text{O/surface})$  and  $E(\text{surface})$  are total electronic energies of oxygen adsorbed on surface and surface alone. The  $E(\text{O}_2)$  is the energy of oxygen gas in its ground state. For Pd surfaces, the most stable oxygen adsorption configurations are an

*fcc* hollow site surrounded by three atoms on the (111) surface, and a center site surrounded by four atoms on the (100) surface, respectively. For Pd-Pt surfaces, the most stable oxygen adsorption configurations are an *fcc* hollow site surrounded by three atoms on the (111) surface, and a bridge site between two atoms on the (100) surface, respectively.

## References

- (1) Blöchl, P. E. Projector Augmented-Wave Method. *Phys. Rev. B* **1994**, *50*, 17953-17979.
- (2) (a) Kresse, G.; Furthmüller, J. Efficient Iterative Schemes for Ab Initio Total-Energy Calculations using a Plane-Wave Basis Set. *Phys. Rev. B* **1996**, *54*, 11169-11186. (b) Kresse, G.; Joubert, D. From Ultrasoft Pseudopotentials to the Projector Augmented-Wave Method. *Phys. Rev. B* **1999**, *59*, 1758-1775.
- (3) Monkhorst, H. J.; Pack, J. D. Special Points for Brillouin-Zone Integrations. *Phys. Rev. B* **1976**, *13*, 5188-5192.

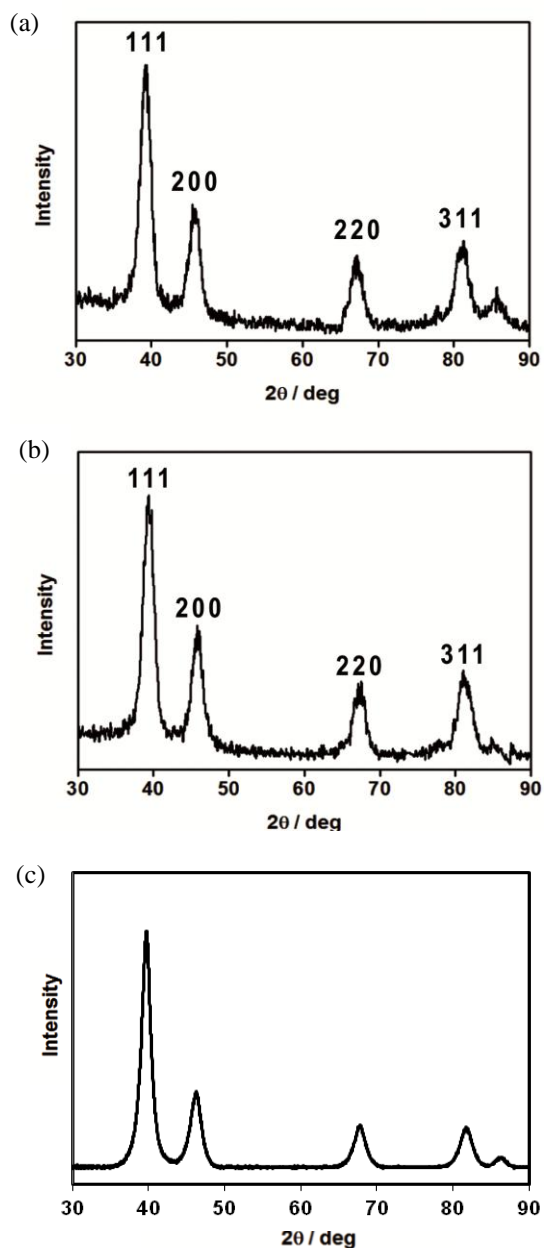

**Figure S1.** XRD patterns of (a) Pd/C cubes, (b) Pd/C octahedra and (c) conventional Pd/C.

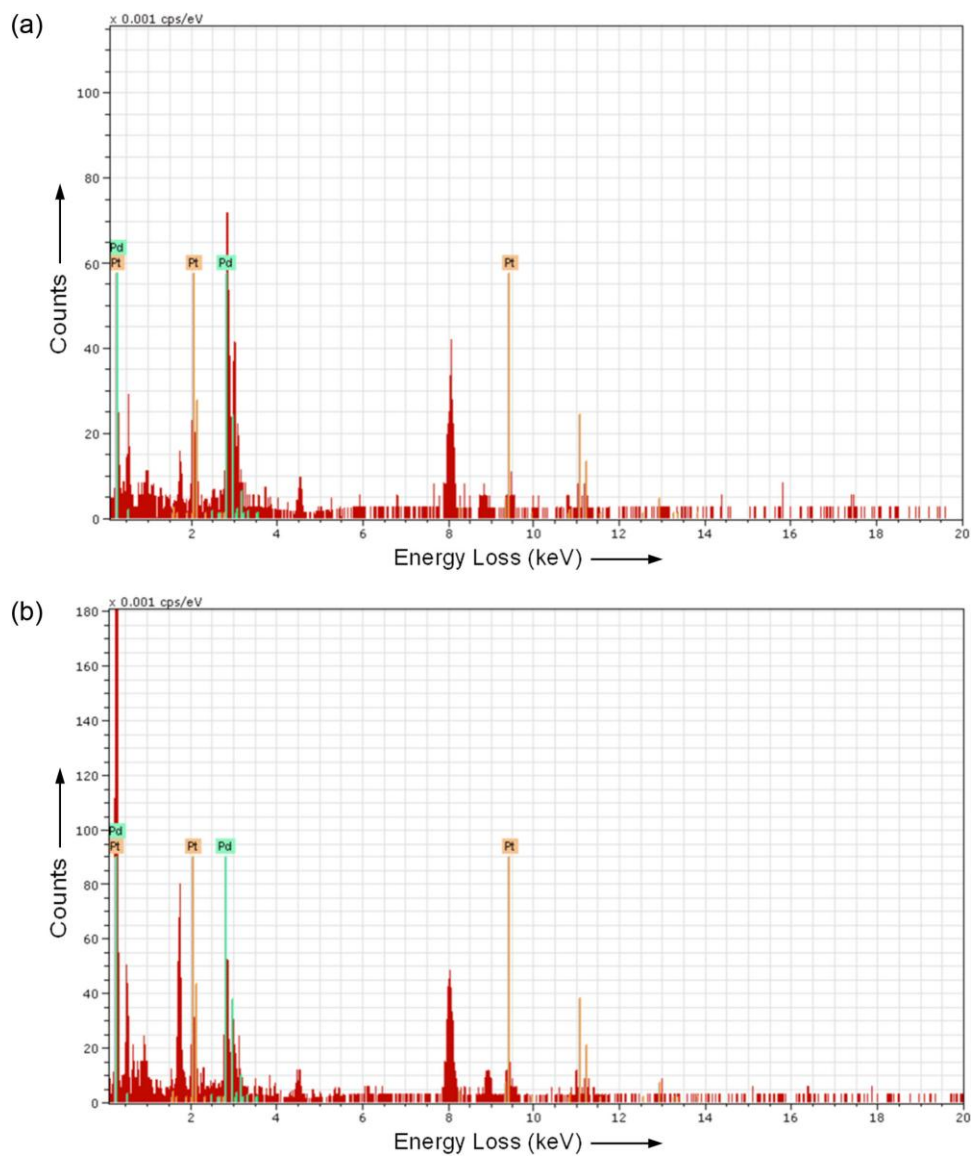

**Figure S2.** EDX patterns of (a) the Pd-Pt/C cubes and (b) Pd-Pt/C octahedra.

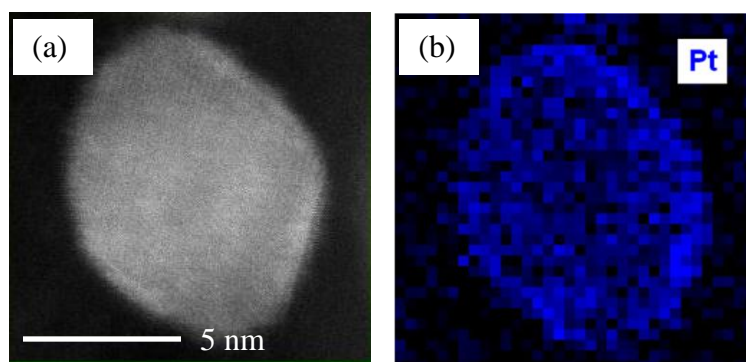

**Figure S3.** (a) STEM and (b) 2D-EELS mapping using Pt M edge of a single Pd-Pt octahedron particle.



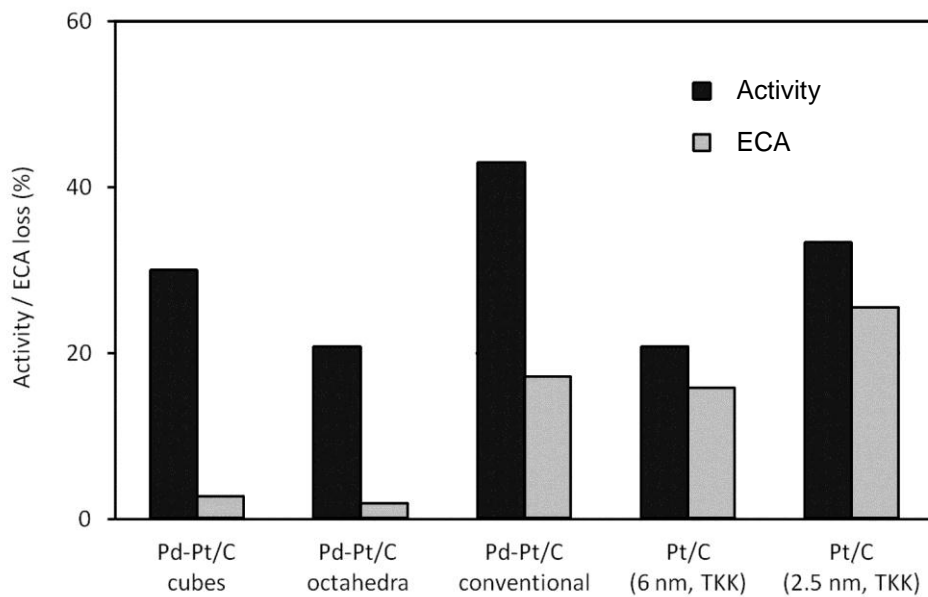

**Figure S4.** Comparison of the losses in activity and ECA for Pt shells on different types of Pd cores after 5000 rounds of potential cycling, with Pt/C (6 nm and 2.5 nm) serving as the benchmark.

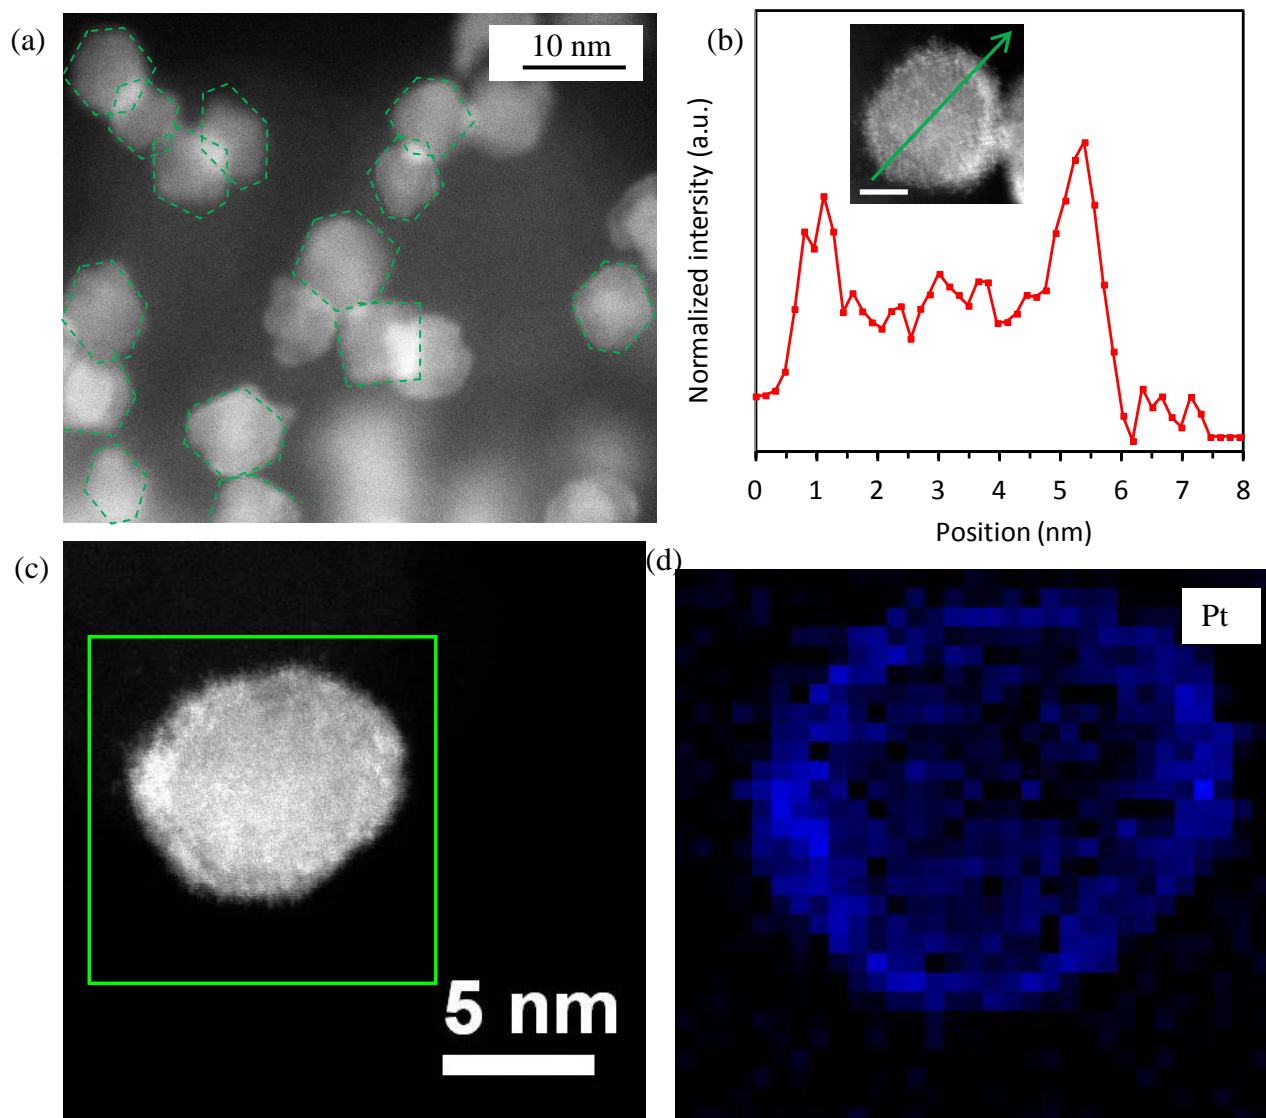

**Figure S5.** Characterization of Pd-Pt/C octahedra after 5000 potential cycles. (a) STEM images, (b) EELS line profile of Pt across a single Pd-Pt nanoparticle shown in the inset, (d) 2D-EELS mapping using Pt M edge of a single Pd-Pt octahedron particle in (c). The scale bar in the inset of (b) is 2 nm.

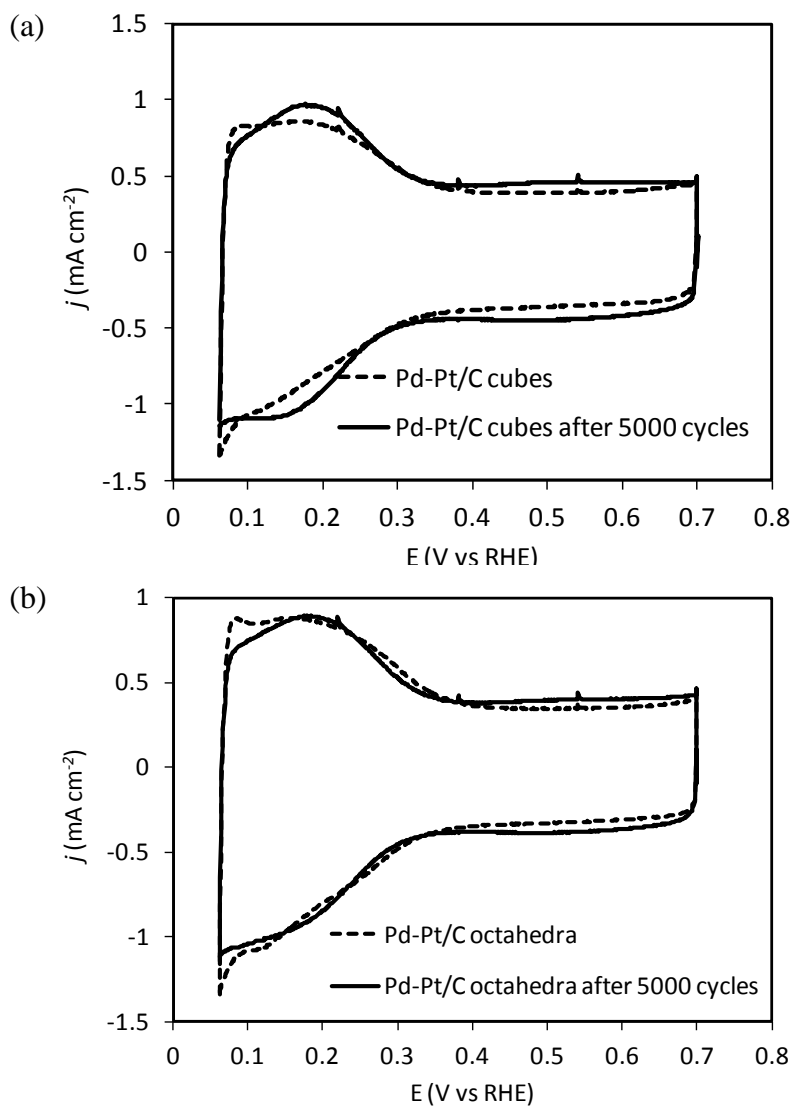

**Figure S6.** Voltammetry curves of Pt shells deposited on (a) Pd cubes and (b) Pd octahedra before and after potential cycling in a nitrogen-saturated 0.1 M  $\text{HClO}_4$  solution. Scanning rate =  $50 \text{ mV s}^{-1}$ . The currents were normalized against the geometric area of the rotating disk electrode ( $0.196 \text{ cm}^2$ ).
